# Supplementary material
Source: ML conference proceedings conference paper supplement (https://openreview.net/forum?id=y9zIRxshzj)
Supplement: supplementary_material [file attachment]

# Online Appendix

## Estimating Global Bank Network Connectedness

Mert Demirer

MIT

Francis X. Diebold

University of Pennsylvania

Laura Liu

University of Pennsylvania

Kamil Yılmaz

Koç University

**Corresponding Author:** Kamil Yılmaz; Koç University, Rumelifeneri Yolu, Sariyer, Istanbul 34450 Turkey; kyilmaz@ku.edu.tr; Tel: +90 212 338 1458; Fax: +90 212 338 1393.

## A Global Bank Detail, by Assets

Here we provide detail on our sample of all 96 publicly-traded banks in the world's top 150 (by assets). In Table A1 we show the banks ordered by assets. We report market capitalizations (as of January 15, 2014) and assets (as of December 31, 2013) in billions of U.S. dollars. In addition, we provide our bank codes (which shows country), along with Reuters tickers. The bank codes are easier to understand than the Reuters tickers, particularly as regards to identifying banks' countries; so we use them in our empirical work.

Table A1: Global Bank Detail (Ordered by Assets)

| <b>Bank Name</b>                | <b>Country</b> | <b>Mcap</b> | <b>Asset</b> | <b>Bank Code</b> | <b>Reuters Ticker</b> |
|---------------------------------|----------------|-------------|--------------|------------------|-----------------------|
| HSBC Holdings                   | UK             | 201.0       | 2,671        | hsba.gb          | hsba.ln               |
| Mitsubishi UFJ Financial Group  | Japan          | 82.2        | 2,504        | mtbh.jp          | X8306.to              |
| BNP Paribas                     | France         | 100.0       | 2,482        | bnp.fr           | bnp.fr                |
| JPMorgan Chase & Co             | US             | 218.0       | 2,416        | jpm.us           | jpm                   |
| Deutsche Bank                   | Germany        | 49.8        | 2,224        | dbk.de           | dbk.xe                |
| Barclays                        | UK             | 68.2        | 2,174        | barc.gb          | barc.ln               |
| Credit Agricole                 | France         | 36.7        | 2,119        | aca.fr           | aca.fr                |
| Bank of America                 | US             | 177.0       | 2,102        | bac.us           | bac                   |
| Citigroup                       | US             | 150.0       | 1,880        | c.us             | c                     |
| Mizuho Financial Group          | Japan          | 49.7        | 1,706        | mzh.jp           | 8411.to               |
| Societe Generale                | France         | 51.6        | 1,703        | gle.fr           | gle.fr                |
| Royal Bank of Scotland Group    | UK             | 35.6        | 1,703        | rbs.gb           | rbs.ln                |
| Sumitomo Mitsui Financial Group | Japan          | 64.3        | 1,567        | smtm.jp          | 8316.to               |
| Banco Santander                 | Spain          | 103.0       | 1,538        | san.es           | san.mc                |
| Wells Fargo                     | US             | 243.0       | 1,527        | wfc.us           | wfc                   |
| ING Groep                       | Netherland     | 55.7        | 1,490        | inga.nl          | inga.ae               |
| Lloyds Banking Group            | UK             | 96.1        | 1,403        | lloy.gb          | lloy.ln               |
| Unicredit                       | Italy          | 47.7        | 1,166        | ucg.it           | ucg.mi                |
| UBS                             | Switzerland    | 80.2        | 1,138        | ubsn.ch          | ubsn.vx               |
| Credit Suisse Group             | Switzerland    | 50.3        | 983          | csgn.ch          | csgn.vx               |
| Goldman Sachs Group             | US             | 74.2        | 912          | gs.us            | gs                    |
| Nordea Bank                     | Sweden         | 55.6        | 870          | nor.se           | ndasek.sk             |
| Intesa Sanpaolo                 | Italy          | 45.8        | 864          | isp.it           | isp.mi                |
| Morgan Stanley                  | US             | 57.7        | 833          | ms.us            | ms                    |
| Toronto-Dominion Bank           | Canada         | 82.7        | 827          | td.ca            | td.t                  |
| Royal Bank of Canada            | Canada         | 93.5        | 825          | ry.ca            | ry.t                  |
| Banco Bilbao Vizcaya Argentaria | Spain          | 70.8        | 803          | bbva.es          | bbva.mc               |
| Commerzbank                     | Germany        | 20.6        | 759          | cbk.de           | cbk.xe                |
| National Australia Bank         | Australia      | 72.4        | 755          | nab.au           | nab.au                |
| Bank of Nova Scotia             | Canada         | 69.8        | 713          | bns.ca           | bns.t                 |
| Commonwealth Bank of Australia  | Australia      | 110.0       | 688          | cba.au           | cba.au                |
| Standard Chartered              | UK             | 52.4        | 674          | stan.gb          | stan.ln               |

*Continued on next page*

Table A1 – *Continued from previous page*

| <b>Bank Name</b>                        | <b>Country</b> | <b>Mcap</b> | <b>Asset</b> | <b>Bank Code</b> | <b>Reuters Ticker</b> |
|-----------------------------------------|----------------|-------------|--------------|------------------|-----------------------|
| China Merchants Bank                    | China          | 35.8        | 664          | cmb.cn           | 600036.sh             |
| Australia and New Zealand Banking Group | Australia      | 77.6        | 656          | anz.au           | anz.au                |
| Westpac Banking                         | Australia      | 91.8        | 650          | wbc.au           | wbc.au                |
| Shanghai Pudong Development Bank        | China          | 29.5        | 608          | shgp.cn          | 600000.sh             |
| Danske Bank                             | Denmark        | 25.6        | 597          | dan.dk           | danske.ko             |
| Sberbank Rossii                         | Russia         | 59.4        | 552          | sber.ru          | sber.mz               |
| China Minsheng Banking Corp             | China          | 29.7        | 533          | cmb.cn           | 600016.sh             |
| Bank of Montreal                        | Canada         | 41.9        | 515          | bmo.ca           | bmo.t                 |
| Itau Unibanco Holding                   | Brazil         | 33.2        | 435          | itub4.br         | itub4.br              |
| Resona Holdings                         | Japan          | 12.2        | 434          | rsnh.jp          | 8308.to               |
| Nomura Holdings                         | Japan          | 25.6        | 422          | nmrh.jp          | 8604.to               |
| Sumitomo Mitsui Trust Holdings          | Japan          | 18.4        | 406          | smtm.jp          | 8309.to               |
| State Bank of India                     | India          | 16.5        | 400          | sbin.in          | sbin.in               |
| DNB ASA                                 | Norway         | 28.9        | 396          | dnb.no           | dnb.os                |
| Svenska Handelsbanken                   | Sweden         | 30.9        | 388          | shba.se          | shba.sk               |
| Skandinaviska Enskilda Banken           | Sweden         | 29.1        | 387          | seba.se          | seba.sk               |
| Canadian Bank of Commerce               | Canada         | 32.4        | 382          | cm.ca            | cm.t                  |
| Bank of New York Mellon                 | US             | 36.3        | 374          | bk.us            | bk.us                 |
| U.S. Bancorp                            | US             | 74.5        | 364          | usb.us           | usb                   |
| Banco Bradesco                          | Brazil         | 23.5        | 355          | bbdc4.br         | bbdc4.br              |
| KBC Groupe                              | Belgium        | 26.0        | 333          | kbc.be           | kbc.bt                |
| PNC Financial Services Group            | US             | 43.5        | 320          | pnc.us           | pnc.us                |
| DBS Group Holdings                      | Singapore      | 32.0        | 318          | d05.sg           | d05.sg                |
| Ping An Bank                            | China          | 19.0        | 313          | pab.cn           | 000001.sz             |
| Woori Finance Holdings                  | Korea          | 8.4         | 309          | wrfh.kr          | 053000.se             |
| Dexia                                   | Belgium        | 0.1         | 307          | dexb.be          | dexb.bt               |
| Capital One Financial                   | US             | 41.5        | 297          | cof.us           | cof                   |
| Shinhan Financial Group                 | Korea          | 18.8        | 295          | shf.kr           | 055550.se             |
| Swedbank                                | Sweden         | 30.8        | 284          | swe.se           | sweda.sk              |
| Hua Xia Bank                            | China          | 12.4        | 276          | hxb.cn           | 600015.sh             |
| Erste Group Bank                        | Austria        | 16.8        | 276          | ebs.at           | ebs.vi                |
| Banca Monte dei Paschi di Siena         | Italy          | 2.9         | 275          | bmpe.it          | bmpe.mi               |
| State Street Corporation                | US             | 30.0        | 243          | stt.us           | stt.us                |
| Banco de Sabadell                       | Spain          | 13.1        | 225          | sab.es           | sab.mc                |
| United Overseas Bank                    | Singapore      | 25.1        | 225          | uob.sg           | u11.sg                |
| Banco Popular Espanol                   | Spain          | 1.3         | 204          | pop.es           | pop.mc                |
| Industrial Bank of Korea                | Korea          | 6.6         | 193          | ibk.kr           | 024110.se             |
| BB&T Corp                               | US             | 26.6        | 183          | bbt.us           | bbt                   |
| Bank of Ireland                         | Ireland        | 14.6        | 182          | bir.ie           | bir.db                |
| National Bank of Canada                 | Canada         | 13.1        | 180          | na.ca            | na.t                  |
| SunTrust Banks                          | US             | 20.3        | 175          | sti.us           | sti.us                |
| Banco Popolare                          | Italy          | 3.6         | 174          | bp.it            | bp.mi                 |
| Malayan Banking Berhad                  | Malaysia       | 26.3        | 171          | may.my           | maybank.ku            |
| Allied Irish Banks                      | Ireland        | 99.9        | 162          | aib.ie           | aib.db                |
| Standard Bank Group                     | South Africa   | 17.7        | 161          | sbk.za           | sbk.jo                |
| American Express                        | US             | 94.7        | 153          | axp              | axp                   |
| National Bank of Greece                 | Greece         | 12.1        | 153          | ete.gr           | ete.at                |

*Continued on next page*

Table A1 – *Continued from previous page*

| <b>Bank Name</b>                        | <b>Country</b> | <b>Mcap</b> | <b>Asset</b> | <b>Bank Code</b> | <b>Reuters Ticker</b> |
|-----------------------------------------|----------------|-------------|--------------|------------------|-----------------------|
| Macquarie Group                         | Australia      | 16.0        | 143          | mqq.au           | mqq.au                |
| Fukuoka Financial Group                 | Japan          | 3.3         | 137          | ffg.jp           | 8354.to               |
| Bank Of Yokohama                        | Japan          | 6.3         | 134          | boy.jp           | 8332.to               |
| Pohjola Bank                            | Finland        | 5.8         | 132          | poh.fi           | poh1s.he              |
| Fifth Third Bancorp                     | US             | 18.5        | 130          | fitb.us          | fitb.us               |
| Regions Financial                       | US             | 14.3        | 117          | rf.us            | rf.us                 |
| Chiba Bank                              | Japan          | 5.2         | 117          | cbb.jp           | 8331.to               |
| Unipol Gruppo Finanziario               | Italy          | 2.8         | 116          | uni.it           | uni.mi                |
| Banco Comercial Portugues               | Portugal       | 5.1         | 113          | bcp.pr           | bcp.lb                |
| CIMB Group Holdings                     | Malaysia       | 16.3        | 113          | cimb.my          | cimb.ku               |
| Bank of Baroda                          | India          | 3.7         | 113          | bob.in           | bankbaroda.in         |
| Turkiye Is Bankasi                      | Turkey         | 8.9         | 112          | isctr.tr         | isctr.is              |
| Banco Espirito Santo                    | Portugal       | 7.1         | 111          | bes.pr           | bes.lb                |
| Hokuhoku Financial Group                | Japan          | 2.5         | 108          | hkf.jp           | 8377.to               |
| Shizuoka Bank                           | Japan          | 6.1         | 104          | shzb.jp          | 8355.to               |
| Mediobanca Banca di Credito Finanziario | Italy          | 8.5         | 95           | mb.it            | mb.mi                 |
| Yamaguchi Financial Group               | Japan          | 2.3         | 93           | yfg.jp           | 8418.to               |

## B Global Bank Detail, by Country

In Table B1 we show the same banks by country, starting with those countries with the most banks, and proceeding through those countries with fewer banks.

Table B1: Global Bank Detail (Ordered by Country)

| <b>Bank Name</b>                | <b>Country</b> | <b>Mcap</b> | <b>Asset</b> | <b>Bank Code</b> | <b>Reuters Ticker</b> |
|---------------------------------|----------------|-------------|--------------|------------------|-----------------------|
| JPMorgan Chase & Co             | US             | 218.0       | 2,416        | jpm.us           | jpm                   |
| Bank of America                 | US             | 177.0       | 2,102        | bac.us           | bac                   |
| Citigroup                       | US             | 150.0       | 1,880        | c.us             | c                     |
| Wells Fargo                     | US             | 243.0       | 1,527        | wfc.us           | wfc                   |
| Goldman Sachs Group             | US             | 74.2        | 912          | gs.us            | gs                    |
| Morgan Stanley                  | US             | 57.7        | 833          | ms.us            | ms                    |
| Bank of New York Mellon         | US             | 36.3        | 374          | bk.us            | bk.us                 |
| U.S. Bancorp                    | US             | 74.5        | 364          | usb.us           | usb                   |
| PNC Financial Services Group    | US             | 43.5        | 320          | pnc.us           | pnc.us                |
| Capital One Financial           | US             | 41.5        | 297          | cof.us           | cof                   |
| State Street Corporation        | US             | 30.0        | 243          | stt.us           | stt.us                |
| BB&T Corp                       | US             | 26.6        | 183          | bbt.us           | BBT                   |
| SunTrust Banks                  | US             | 20.3        | 175          | sti.us           | sti.us                |
| American Express                | US             | 94.7        | 153          | axp              | axp                   |
| Fifth Third Bancorp             | US             | 18.5        | 130          | fitb.us          | fitb.us               |
| Regions Financial               | US             | 14.3        | 117          | rf.us            | rf.us                 |
| Mitsubishi UFJ Financial Group  | Japan          | 82.2        | 2,504        | mtbh.jp          | X8306.to              |
| Mizuho Financial Group          | Japan          | 49.7        | 1,706        | mzh.jp           | 8411.to               |
| Sumitomo Mitsui Financial Group | Japan          | 64.3        | 1,567        | smtm.jp          | 8316.to               |
| Resona Holdings                 | Japan          | 12.2        | 434          | rsnh.jp          | 8308.to               |
| Nomura Holdings                 | Japan          | 25.6        | 422          | nmrh.jp          | 8604.to               |
| Sumitomo Mitsui Trust Holdings  | Japan          | 18.4        | 406          | smtm.jp          | 8309.to               |
| Fukuoka Financial Group         | Japan          | 3.3         | 137          | ffg.jp           | 8354.to               |
| Bank Of Yokohama                | Japan          | 6.3         | 134          | boy.jp           | 8332.to               |
| Chiba Bank                      | Japan          | 5.2         | 117          | cbb.jp           | 8331.to               |
| Hokuhoku Financial Group        | Japan          | 2.5         | 108          | hkf.jp           | 8377.to               |
| Shizuoka Bank                   | Japan          | 6.1         | 104          | shzb.jp          | 8355.to               |
| Yamaguchi Financial Group       | Japan          | 2.3         | 93           | yfg.jp           | 8418.to               |
| Toronto-Dominion Bank           | Canada         | 82.7        | 827          | td.ca            | td.t                  |
| Royal Bank of Canada            | Canada         | 93.5        | 825          | ry.ca            | ry.t                  |
| Bank of Nova Scotia             | Canada         | 69.8        | 713          | bns.ca           | bns.t                 |
| Bank of Montreal                | Canada         | 41.9        | 515          | bmo.ca           | bmo.t                 |
| Canadian Bank of Commerce       | Canada         | 32.4        | 382          | cm.ca            | cm.t                  |
| National Bank of Canada         | Canada         | 13.1        | 180          | na.ca            | na.t                  |
| Unicredit                       | Italy          | 47.7        | 1,166        | ucg.it           | ucg.mi                |
| Intesa Sanpaolo                 | Italy          | 45.8        | 864          | isp.it           | isp.mi                |
| Banca Monte dei Paschi di Siena | Italy          | 2.9         | 275          | bmpe.it          | bmpe.mi               |
| Banco Popolare                  | Italy          | 3.6         | 174          | bp.it            | bp.mi                 |
| Unipol Gruppo Finanziario       | Italy          | 2.8         | 116          | uni.it           | uni.mi                |

*Continued on next page*

Table B1 – *Continued from previous page*

| <b>Bank Name</b>                        | <b>Country</b> | <b>Mcap</b> | <b>Asset</b> | <b>Bank Code</b> | <b>Reuters Ticker</b> |
|-----------------------------------------|----------------|-------------|--------------|------------------|-----------------------|
| Mediobanca Banca di Credito Finanziario | Italy          | 8.5         | 95           | mb.it            | mb.mi                 |
| National Australia Bank                 | Australia      | 72.4        | 755          | nab.au           | nab.au                |
| Commonwealth Bank of Australia          | Australia      | 110.0       | 688          | cba.au           | cba.au                |
| Australia and New Zealand Banking Group | Australia      | 77.6        | 656          | anz.au           | anz.au                |
| Westpac Banking                         | Australia      | 91.8        | 650          | wbc.au           | wbc.au                |
| Macquarie Group                         | Australia      | 16.0        | 143          | mqg.au           | mqg.au                |
| China Merchants Bank                    | China          | 35.8        | 664          | cmb.cn           | 600036.sh             |
| Shanghai Pudong Development Bank        | China          | 29.5        | 608          | shgp.cn          | 600000.sh             |
| China Minsheng Banking Corp             | China          | 29.7        | 533          | cmb.cn           | 600016.sh             |
| Ping An Bank                            | China          | 19.0        | 313          | pab.cn           | 000001.sz             |
| Hua Xia Bank                            | China          | 12.4        | 276          | hxb.cn           | 600015.sh             |
| HSBC Holdings                           | UK             | 201.0       | 2,671        | hsba.gb          | hsba.ln               |
| Barclays                                | UK             | 68.2        | 2,174        | barc.gb          | barc.ln               |
| Royal Bank of Scotland Group            | UK             | 35.6        | 1,703        | rbs.gb           | rbs.ln                |
| Lloyds Banking Group                    | UK             | 96.1        | 1,403        | lloy.gb          | lloy.ln               |
| Standard Chartered                      | UK             | 52.4        | 674          | stan.gb          | stan.ln               |
| Banco Santander                         | Spain          | 103.0       | 1,538        | san.es           | san.mc                |
| Banco Bilbao Vizcaya Argentaria         | Spain          | 70.8        | 803          | bbva.es          | bbva.mc               |
| Banco de Sabadell                       | Spain          | 13.1        | 225          | sab.es           | sab.mc                |
| Banco Popular Espanol                   | Spain          | 1.3         | 204          | pop.es           | pop.mc                |
| Nordea Bank                             | Sweden         | 55.6        | 870          | nor.se           | ndasek.sk             |
| Svenska Handelsbanken                   | Sweden         | 30.9        | 388          | shba.se          | shba.sk               |
| Skandinaviska Enskilda Banken           | Sweden         | 29.1        | 387          | seba.se          | seba.sk               |
| Swedbank                                | Sweden         | 30.8        | 284          | swe.se           | sweda.sk              |
| BNP Paribas                             | France         | 100.0       | 2,482        | bnp.fr           | bnp.fr                |
| Credit Agricole                         | France         | 36.7        | 2,119        | aca.fr           | aca.fr                |
| Societe Generale                        | France         | 51.6        | 1,703        | gle.fr           | gle.fr                |
| Woori Finance Holdings                  | Korea          | 8.4         | 309          | wrfh.kr          | 053000.se             |
| Shinhan Financial Group                 | Korea          | 18.8        | 295          | shf.kr           | 055550.se             |
| Industrial Bank of Korea                | Korea          | 6.6         | 193          | ibk.kr           | 024110.se             |
| UBS                                     | Switzerland    | 80.2        | 1,138        | ubsn.ch          | ubsn.vx               |
| Credit Suisse Group                     | Switzerland    | 50.3        | 983          | csgn.ch          | csgn.vx               |
| KBC Groupe                              | Belgium        | 26.0        | 333          | kbc.be           | kbc.bt                |
| Dexia                                   | Belgium        | 0.1         | 307          | dexb.be          | dexb.bt               |
| Itau Unibanco Holding                   | Brazil         | 33.2        | 435          | itub4.br         | itub4.br              |
| Banco Bradesco                          | Brazil         | 23.5        | 355          | bbdc4.br         | bbdc4.br              |
| Deutsche Bank                           | Germany        | 49.8        | 2,224        | dbk.de           | dbk.xe                |
| Commerzbank                             | Germany        | 20.6        | 759          | cbk.de           | cbk.xe                |
| Bank of Ireland                         | Ireland        | 14.6        | 182          | bir.ie           | bir.db                |
| Allied Irish Banks                      | Ireland        | 99.9        | 162          | aib.ie           | aib.db                |
| State Bank of India                     | India          | 16.5        | 400          | sbin.in          | sbin.in               |
| Bank of Baroda                          | India          | 3.7         | 113          | bob.in           | bankbaroda.in         |
| Malayan Banking Berhad                  | Malaysia       | 26.3        | 171          | may.my           | maybank.ku            |
| CIMB Group Holdings                     | Malaysia       | 16.3        | 113          | cimb.my          | cimb.ku               |
| Banco Comercial Portugues               | Portugal       | 5.1         | 113          | bcp.pr           | bcp.lb                |
| Banco Espirito Santo                    | Portugal       | 7.1         | 111          | bes.pr           | bes.lb                |
| DBS Group Holdings                      | Singapore      | 32.0        | 318          | d05.sg           | d05.sg                |

*Continued on next page*

Table B1 – *Continued from previous page*

| <b>Bank Name</b>        | <b>Country</b> | <b>Mcap</b> | <b>Asset</b> | <b>Bank Code</b> | <b>Reuters Ticker</b> |
|-------------------------|----------------|-------------|--------------|------------------|-----------------------|
| United Overseas Bank    | Singapore      | 25.1        | 225          | uob.sg           | u11.sg                |
| Erste Group Bank        | Austria        | 16.8        | 276          | ebs.at           | ebs.vi                |
| Danske Bank             | Denmark        | 25.6        | 597          | dan.dk           | danske.ko             |
| Pohjola Bank            | Finland        | 5.8         | 132          | poh.fi           | poh1s.he              |
| National Bank of Greece | Greece         | 12.1        | 153          | ete.gr           | ete.at                |
| ING Groep               | Netherlands    | 55.7        | 1,490        | inga.nl          | inga.ae               |
| DNB ASA                 | Norway         | 28.9        | 396          | dnb.no           | dnb.os                |
| Sberbank Rossii         | Russia         | 59.4        | 552          | sber.ru          | sber.mz               |
| Turkiye Is Bankasi      | Turkey         | 8.9         | 112          | isctr.tr         | isctr.is              |
| Standard Bank Group     | South Africa   | 17.7        | 161          | sbk.za           | sbk.jo                |
